# Supplementary material for: MicroRNA-Enriched Exosomes from Different Sources of Mesenchymal Stem Cells Can Differentially Modulate Functions of Immune Cells and Neurogenesis
Source: MDPI journal article supplement (doi:10.3390/biomedicines10010069), 2021-12-30
Supplement: s1 [file s1]

# Supplementary Materials

**Table S1.** Details of samples used in this study.

| S No | Sample ID | Tissue Source   | Age    | Gender |
|------|-----------|-----------------|--------|--------|
| 1    | BM1820    | Bone Marrow     | 30 yrs | Male   |
| 2    | BM1916    |                 | 35 yrs | Female |
| 3    | BM1931    |                 | 40 yrs | Female |
| 4    | BM1932    |                 | 42 yrs | Male   |
| 5    | AD1901    | Adipose Tissue  | 25 yrs | Male   |
| 6    | AD1905    |                 | 20 yrs | Male   |
| 7    | AD1908    |                 | 32 yrs | Female |
| 8    | AD1914    |                 | 28 yrs | Female |
| 9    | WJ75      | Wharton's Jelly | 30 yrs | Female |
| 10   | WJ78      |                 | 25 yrs | Female |
| 11   | WJ1901    |                 | 28 yrs | Female |
| 12   | WJ1905    |                 | 40 yrs | Female |

**Table S2.** List of miRNAs associated with different disease and cellular pathways. found in IPA analysis.

| Category                                             | p-Value                                        | Molecules                                                                                                                                                                                                                                                                                                                                          |
|------------------------------------------------------|------------------------------------------------|----------------------------------------------------------------------------------------------------------------------------------------------------------------------------------------------------------------------------------------------------------------------------------------------------------------------------------------------------|
| Developmental Disorder                               | $3.21 \times 10^{-46}$ – $5.86 \times 10^{-4}$ | let-7, mir-10, mir-103, mir-127, mir-130, <b>mir-143</b> , <b>mir-146</b> , mir-148, mir-15, mir-154, mir-155, mir-199, mir-21, mir-214, mir-22, mir-221, mir-25, mir-28, mir-30, mir-31, mir-320, mir-34, mir-378, mir-379, mir-432, mir-654                                                                                                      |
| Inflammatory Disease                                 | $4.27 \times 10^{-40}$ – $4.54 \times 10^{-3}$ | let-7, mir-10, mir-103, mir-130, <b>mir-143</b> , <b>mir-146</b> , mir-148, mir-15, mir-154, mir-155, <b>mir-181</b> , mir-186, mir-196, mir-199, mir-21, mir-214, mir-22, mir-221, mir-224, mir-23, mir-25, mir-26, mir-27, mir-28, mir-29, mir-30, mir-31, mir-320, mir-322, mir-34, mir-378, mir-379, mir-423, <b>mir-486</b> , mir-654         |
| Respiratory Disease                                  | $4.27 \times 10^{-40}$ – $1.4 \times 10^{-3}$  | let-7, mir-10, mir-103, mir-130, <b>mir-143</b> , <b>mir-146</b> , mir-148, mir-15, mir-154, mir-155, <b>mir-181</b> , mir-186, mir-191, mir-196, mir-199, mir-21, mir-214, mir-22, mir-221, mir-224, mir-23, mir-25, mir-26, mir-27, mir-29, mir-30, mir-31, mir-320, mir-322, mir-34, <b>mir-378</b> , mir-379, mir-423, mir-432, <b>mir-486</b> |
| Neurological Disease                                 | $6.49 \times 10^{-40}$ – $6.88 \times 10^{-3}$ | let-7, mir-10, mir-103, mir-130, <b>mir-143</b> , <b>miR-145</b> , <b>mir-146</b> , mir-148, mir-15, mir-154, mir-155, <b>mir-181</b> , mir-186, mir-196, mir-199, mir-21, mir-214, mir-22, mir-221, mir-23, mir-25, mir-26, mir-27, mir-28, mir-29, mir-30, mir-31, mir-320, mir-322, mir-34, mir-423, MIR4516                                    |
| Cellular Growth and Proliferation                    | $7.5 \times 10^{-24}$ – $6.05 \times 10^{-3}$  | let-7, mir-10, mir-103, mir-130, <b>mir-143</b> , <b>mir-146</b> , mir-148, mir-15, mir-154, mir-155, <b>mir-181</b> , mir-186, mir-191, mir-196, mir-199, mir-21, mir-214, mir-22, mir-221, mir-224, mir-23, mir-25, mir-26, mir-27, mir-28, mir-29, mir-30, mir-31, mir-320, mir-322, mir-34, <b>mir-378</b> , mir-379, <b>mir-486</b> , mir-654 |
| Cell Death and Survival                              | $6.42 \times 10^{-22}$ – $6.73 \times 10^{-3}$ | let-7, mir-10, mir-130, <b>mir-143</b> , <b>mir-146</b> , mir-148, mir-15, mir-154, mir-155, <b>mir-181</b> , mir-186, mir-191, mir-199, mir-21, mir-214, mir-22, mir-221, mir-23, mir-25, mir-26, mir-27, mir-29, mir-30, mir-320, mir-322, mir-34, <b>mir-378</b> , mir-379, <b>mir-486</b> , mir-493, mir-654                                   |
| Inflammatory Response TH1 and TH2 activation pathway | $5.79 \times 10^{-18}$ – $6.05 \times 10^{-3}$ | let-7, mir-10, mir-130, <b>mir-143</b> , <b>mir-146</b> , mir-148, mir-15, mir-154, mir-155, <b>mir-181</b> , mir-199, mir-21, mir-22, mir-221, mir-23, mir-25, mir-27, mir-29, mir-30, mir-31, mir-320, mir-34, <b>mir-378</b> , mir-423, <b>mir-486</b> , mir-654                                                                                |

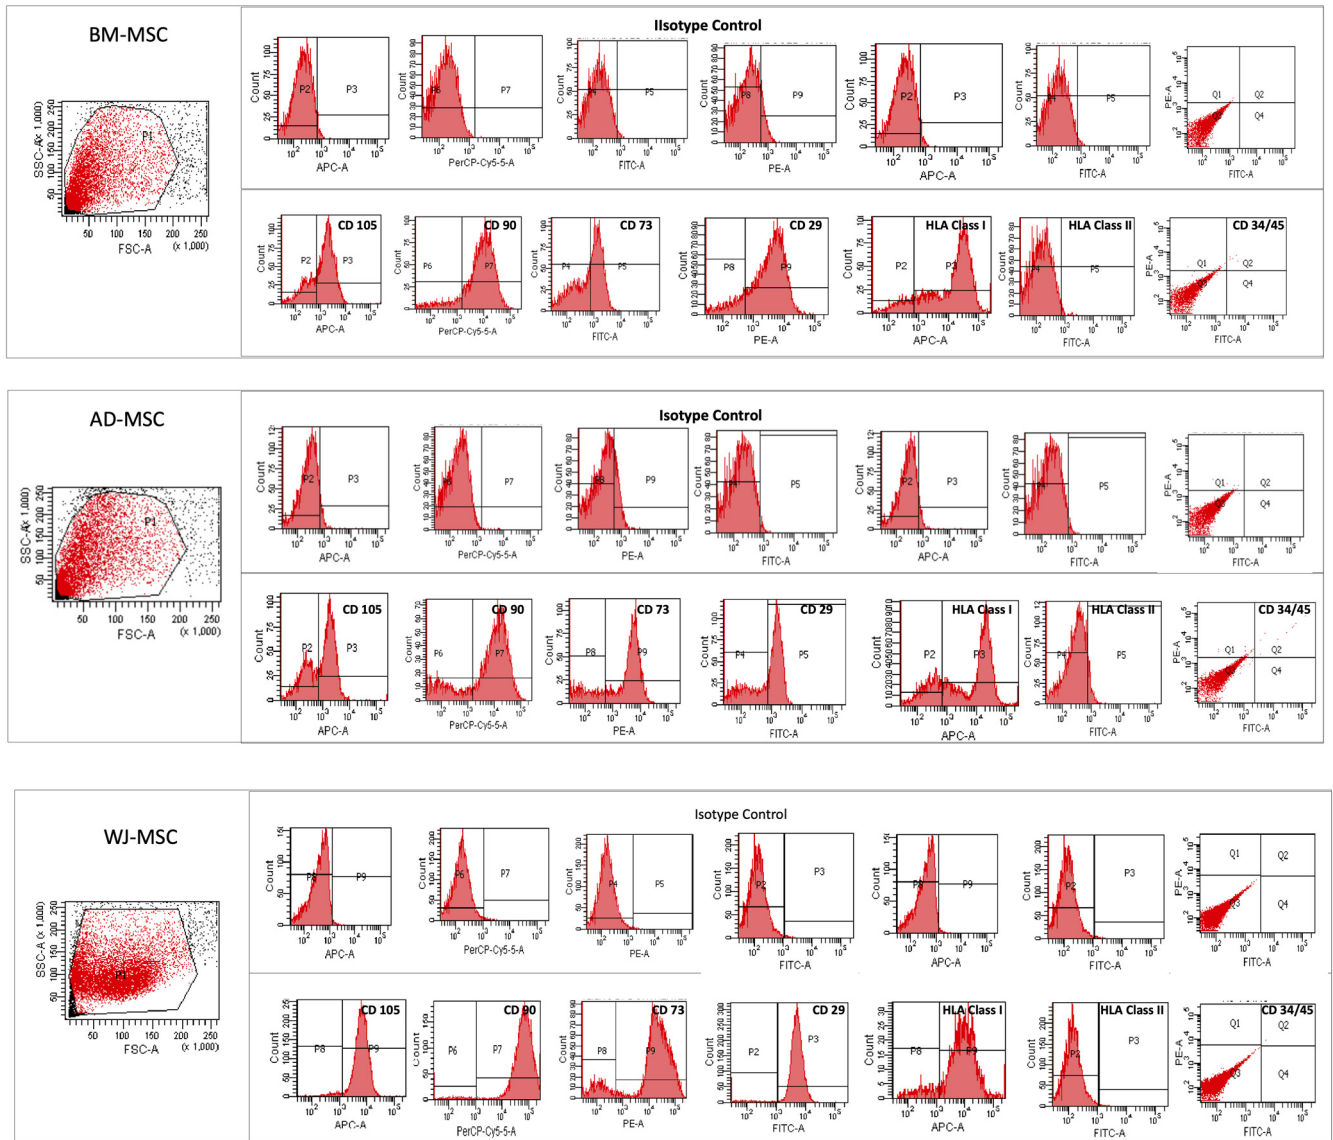

**Figure S1.** Flow cytometric analysis of hMSCs showing expression of positive surface markers CD90, CD105, Cd29, CD73 and HLA Class-I and expression of negative surface markers HLA Class-II and CD34/45.

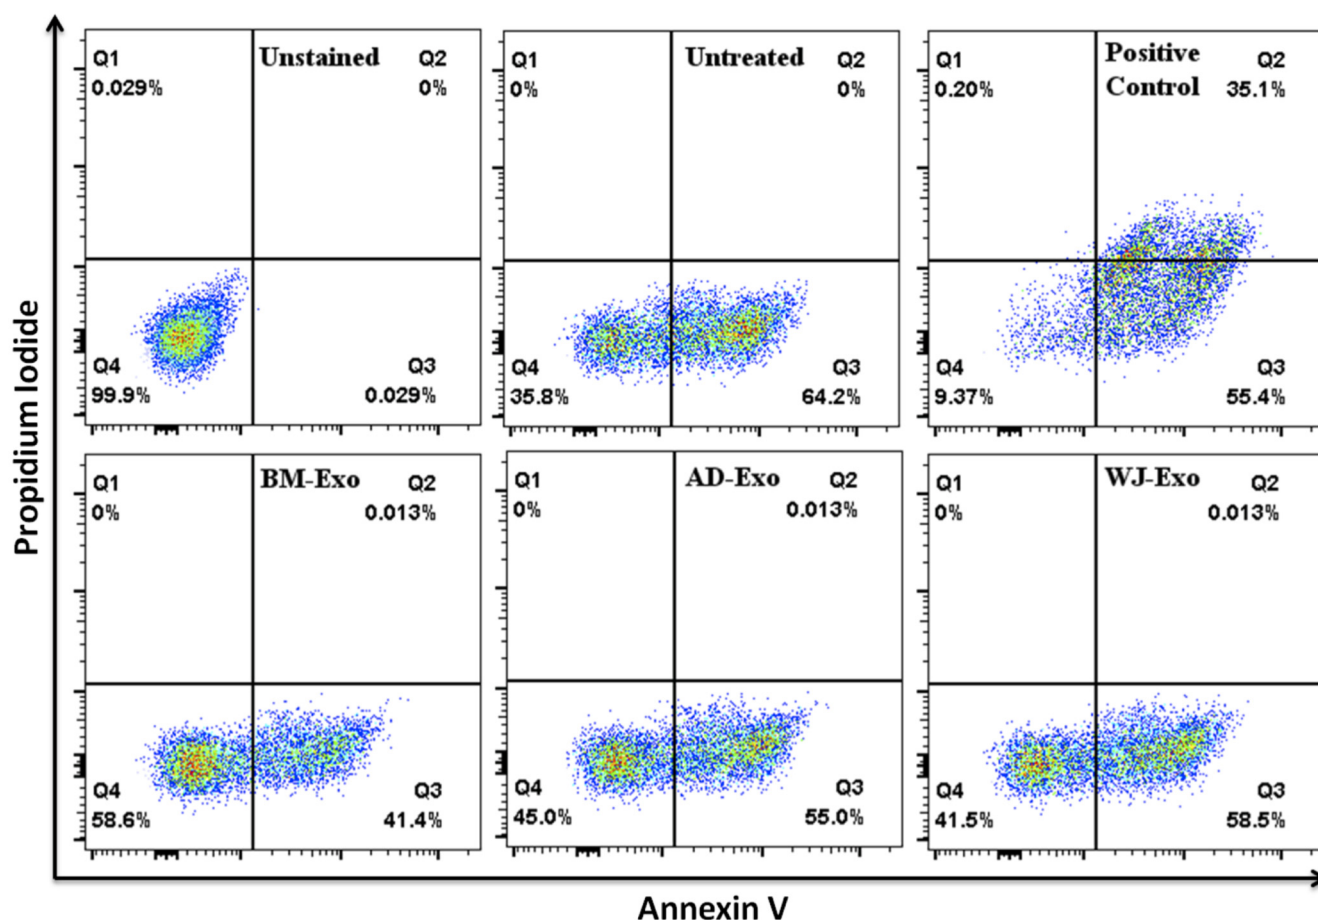

**Figure S2.** Two-dimensional dot plots representing early apoptotic cells upon treatment of neutrophils with MSCs-Exosomes. Annexin V/PI double staining kit has been used in flow cytometric analyses for detecting cellular apoptosis, while propidium iodide (PI) is used to detect necrotic or late apoptotic cells. The data generated by flow cytometry are plotted in two-dimensional dot plots in which PI is represented versus Annexin V-FITC. These plots can be divided in four regions corresponding to: (1) viable cells (PI/FITC -/-; Q4); (2) early apoptotic cells (PI/FITC +/-; Q3); (3) late apoptotic cells (PI/FITC +/+; Q2); (4) necrotic cells (PI/FITC +/-; Q1). .

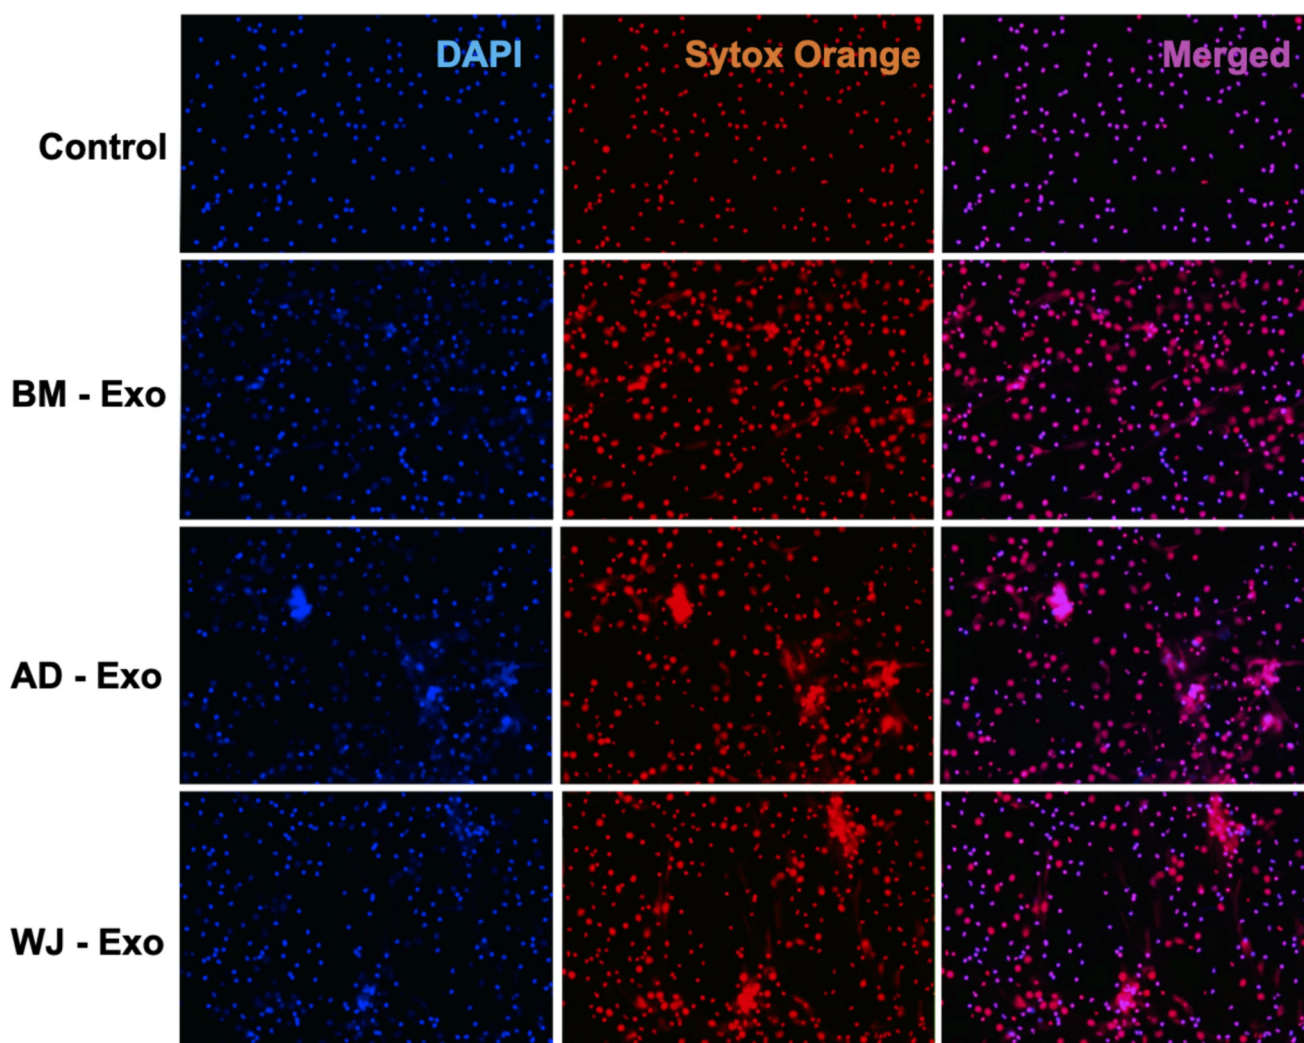

**Figure S3 Representative images of neutrophils after 24 h post incubation in presence or absence of MSCs exosomes.** Neutrophils were seeded in a 96 well clear bottom plate at a seeding density of  $0.2 \times 10^6$  cells per ml and incubated with exosomes for 6 hours. After incubation the cells were fixed with PFA and stained with sytox orange (25  $\mu$ M) and DAPI for 15 min. The cells were then observed in ImageXpress Micro Confocal High content imaging System (Molecular Devices).
